# Supplementary material
Source: Springer Nature journal article supplement (https://www.springermedizin.de/resource/supplementary/12882_2012_411_MOESM3_ESM.pdf/9453712)
Supplement: MOESM3 [file 9453712]

Random sample of patients with T2DM included in the 2007 Gedaps evaluation

(n= 3150)

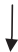

Type 2 diabetic patients with creatinine available —→ Prevalence of renal impairment

(n= 2,642)

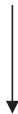

Type 2 diabetic patients with available urinary albumin excretion rate

(n= 1,478)

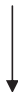

Prevalence of kidney disease according to KDIGO workgroup, nonalbuminuric renal impairment and albuminuria alone.
